# Supplementary material
Source: PubMed Central journal article supplement (PMC3378803)
Supplement: NIHMS357526-supplement-supplement_1.pdf [file NIHMS357526-supplement-supplement_1.pdf]

Table S1. Zero-order and partial correlation (controlling for general intelligence) coefficients (and two-tailed  $p$ -values) between emotional intelligence scales and psychopathy components for inmates 50 years of age or younger.

|                                | Psychopathy   |                |               |                |                |                |
|--------------------------------|---------------|----------------|---------------|----------------|----------------|----------------|
|                                | Total Scores  |                | Factor 1      |                | Factor 2       |                |
|                                | $r$           | partial $r$    | $r$           | partial $r$    | $r$            | partial $r$    |
| Global EI                      | -.06<br>(.25) | -.11<br>(.055) | -.02<br>(.78) | -.08<br>(.15)  | -.09<br>(.11)  | -.10<br>(.09)  |
| Experiential EI                | -.04<br>(.51) | -.06<br>(.26)  | -.01<br>(.85) | -.05<br>(.33)  | -.03<br>(.57)  | -.03<br>(.58)  |
| Perceiving Emotions<br>(B1)    | -.01<br>(.80) | -.04<br>(.52)  | .03<br>(.61)  | -.01<br>(.89)  | -.02<br>(.68)  | -.02<br>(.69)  |
| Facilitating Thought<br>(B2)   | -.04<br>(.42) | -.06<br>(.24)  | -.04<br>(.43) | -.08<br>(.14)  | -.02<br>(.69)  | -.02<br>(.73)  |
| Strategic EI                   | -.10<br>(.08) | -.15<br>(.006) | -.04<br>(.43) | -.12<br>(.03)  | -.14<br>(.01)  | -.16<br>(.004) |
| Understanding Emotions<br>(B3) | -.05<br>(.33) | -.09<br>(.09)  | .01<br>(.92)  | -.05<br>(.36)  | -.11<br>(.04)  | -.12<br>(.03)  |
| Managing Emotions<br>(B4)      | -.08<br>(.12) | -.12<br>(.02)  | -.04<br>(.41) | -.10<br>(.057) | -.11<br>(.055) | -.11<br>(.04)  |

Note.  $N=328$ ,  $df=325$  for partial correlations. Shaded cells indicate significant ( $p<.05$ ) results in the full sample ( $n=344$ , including  $n=16$  participants over 50 years of age).
